# Supplementary material
Source: Springer Nature journal article supplement (https://www.springermedizin.de/resource/supplementary/12889_2014_6746_MOESM3_ESM.pdf/9498946)
Supplement: MOESM3 [file 9498946]

Additional file 3

**Sri Lanka Diabetes and Cardiovascular Diseases Study (SLDCS)**

**Calculation of the number of units of different types of alcohol in Sri Lanka**  
(Reference Table)

| <b>Type of Alcohol</b> | <b>Pure alcohol %<br/>by volume</b> | <b>A single unit<br/>in ml</b> | <b>1 unit in conventional<br/>measurements</b> |
|------------------------|-------------------------------------|--------------------------------|------------------------------------------------|
| Arrack                 | 34-36                               | 30                             | One drink                                      |
| Illicit spirits*       | 20(approx.)                         | 50                             | Two shots/drinks                               |
| Beer                   | 4.5-5                               | 200-250                        | Half a pint                                    |
| Toddy                  | 5                                   | 200-250                        | Half a pint                                    |
| Whisky                 | 40-43                               | 25                             | One drink                                      |
| Wine                   | 11-12                               | 175                            | One small glass                                |

\*Includes 'Kassippu' (Moon shine/homemade alcohol)
